# Supplementary material for: Chronic antidepressant treatment rescues abnormally reduced REM sleep theta power in socially defeated rats
Source: Sci Rep. 2021 Aug 18;11:16713. doi: 10.1038/s41598-021-96094-0 (PMC8373914; doi:10.1038/s41598-021-96094-0)
Supplement: Supplementary file 2 — Supplementary Information 2. [file 41598_2021_96094_MOESM2_ESM.pdf]

**Chronic antidepressant treatment rescues abnormally reduced REM sleep theta power in socially defeated rats**  
Yoshiki Matsuda, Ph.D.<sup>1, \*</sup>, Nobuyuki Ozawa, Ph.D.<sup>1</sup>, Takiko Shinozaki, B.D.<sup>1</sup>, Kazuhisa Aoki, Ph.D.<sup>1</sup>, Naomi Nihonmatsu-Kikuchi, Ph.D.<sup>1</sup>, Toshikazu Shinba, M.D., Ph.D.<sup>1, 2</sup>, Yoshitaka Tatebayashi, M.D., Ph.D.<sup>1</sup>  
<sup>1</sup> *Affective Disorders Research Project, Tokyo Metropolitan Institute of Medical Science, Tokyo, JAPAN*  
<sup>2</sup> *Department of Psychiatry, Shizuoka Saiseikai General Hospital, Shizuoka, JAPAN.*

**Supplementary Table S1.** Summary of the sleep changes in the chronic stress models. The information in the colored cells indicates the post-stress effects of chronic stress.

| Chronic stress Model                    | Species                          | Duration of stress | Methods                                                                                                                                                | EEG timing                                                                                                                     | REM sleep duration                                                                                                                     | REM sleep bout number                                       | REM theta power                                                    | REM latency                                                          | NREM sleep duration                                                            | NREM sleep bout number          | NREM delta power                                                                              | Post-stress abnormalities                                                                                                    | Effects of antidepressants | Reference                           | Comments                                                                                                                                                               |
|-----------------------------------------|----------------------------------|--------------------|--------------------------------------------------------------------------------------------------------------------------------------------------------|--------------------------------------------------------------------------------------------------------------------------------|----------------------------------------------------------------------------------------------------------------------------------------|-------------------------------------------------------------|--------------------------------------------------------------------|----------------------------------------------------------------------|--------------------------------------------------------------------------------|---------------------------------|-----------------------------------------------------------------------------------------------|------------------------------------------------------------------------------------------------------------------------------|----------------------------|-------------------------------------|------------------------------------------------------------------------------------------------------------------------------------------------------------------------|
| Unpredictable chronic mild stress       | Male albino rats                 | 3 weeks            |                                                                                                                                                        | during stress soon after the end of the stress                                                                                 | increased returned to normal                                                                                                           | N/A                                                         | N/A                                                                | shortened returned to normal                                         | N/A                                                                            | N/A                             | N/A                                                                                           | quickly returned to normal                                                                                                   | N/A                        | Moreau et al., 1995 <sup>1</sup>    |                                                                                                                                                                        |
| Unpredictable chronic mild stress       | Male Lister hooded rats          | 5 weeks            |                                                                                                                                                        | during stress                                                                                                                  | increased at 3rd week                                                                                                                  | probably increased                                          | N/A                                                                | shortened maximally at 3rd week, then returned to normal at 5th week | decreased at 3rd week                                                          | probably increased              | N/A                                                                                           |                                                                                                                              | N/A                        | Cheeta et al., 1997 <sup>2</sup>    |                                                                                                                                                                        |
| Unpredictable chronic mild stress       | Male SD rats                     | 5 weeks            |                                                                                                                                                        | 4th week during the stress                                                                                                     | increased                                                                                                                              | increased                                                   | N/A                                                                | no change                                                            | SWS1: increased SWS2: no change                                                | SWS1: increased SWS2: no change | N/A                                                                                           |                                                                                                                              | N/A                        | Grønli et al, 2004 <sup>3</sup>     |                                                                                                                                                                        |
| Unpredictable chronic mild stress       | Male BALB/cJ mice                | 9 weeks            |                                                                                                                                                        | during stress                                                                                                                  | increased                                                                                                                              | increased                                                   | increased                                                          | N/A                                                                  | unchanged                                                                      | increased                       | unchanged                                                                                     |                                                                                                                              | N/A                        | Nollet et al., 2019 <sup>4</sup>    |                                                                                                                                                                        |
| chronic immobilization stress           | Male Wistar rats                 | 10 days            | daily 2hour immobilization stress                                                                                                                      | 7th, 14th, and 21st day after the stress                                                                                       | devided into two groups (increased or decreased REM durations )                                                                        | no change                                                   | decreased or no change                                             | N/A                                                                  | no change                                                                      | N/A                             | N/A                                                                                           | devided into two groups (increased or decreased REM durations) and prolonged up to 21st day                                  | N/A                        | Hegde et al., 2011 <sup>5</sup>     |                                                                                                                                                                        |
| Water Immersion and Restraint Stress    | Male C57Bl/6J mice               | 3 weeks            | 2 hour immobilization in the tube immersed in the water to the xiphoid process. Once a day for 6 consecutive days per week for 3 weeks                 | 1st, 2nd, and 3rd week during the stress                                                                                       | increased                                                                                                                              | increased                                                   | decreased                                                          | no change                                                            | increased                                                                      | no change                       | increased                                                                                     |                                                                                                                              | N/A                        | Yasugaki et al., 2019 <sup>6</sup>  |                                                                                                                                                                        |
| chronic SDS (Miczek-type <sup>8</sup> ) | Male and female Fischer 344 rats | 4 weeks            | up to 5 (for male) and 10 (for female) times attacks and 1 hour indirect interaction. 3-4 sessions per week for 4 weeks                                | 2nd week of the 4 week SDS**<br>One day after the end of the 4 week SDS**                                                      | decreased<br>returned to normal                                                                                                        | decreased<br>partially returned to normal                   | N/A<br>N/A                                                         | N/A<br>N/A                                                           | no change<br>no change                                                         | no change<br>no change          | N/A                                                                                           | Most of the parameters returned to the baseline levels                                                                       | N/A                        | Page et al., 2016 <sup>7</sup>      | *The SDS method was originally developed by Miczek (1979) <sup>8</sup> .<br>**EEG was measured during the weekend during which no SDS was performed.                   |
| chronic SDS (Miczek-type <sup>8</sup> ) | Male C57Bl/6J mice               | 10 days            | up to 5 min direct interaction and up to 30 min indirect interaction during the first 3 hours of the light phase                                       | 1st, 3rd, and 10th day of the 10-day SDS, after SDS sessions, EEG was subsequently measured***<br>5 days after the last stress | decreased in light phase but increased in dark phase<br>decreased in the first 3 hours of the light phase only in the susceptible mice | decreased in light phase but increased in dark phase<br>N/A | decreased in light phase but unchanged in dark phase<br>no change  | N/A<br>N/A                                                           | unchanged in light phase but increased in dark phase<br>N/A                    | no change<br>N/A                | increased in light phase but unchanged in dark phase<br>no change in the light phase          |                                                                                                                              | N/A                        | Henderson et al., 2017 <sup>9</sup> | *The SDS method was originally developed by Miczek (1979) <sup>8</sup> .<br>***EEG was measured subsequently after the SDS, thus the SDS directly affect the EEG data. |
| chronic SDS (Miczek-type <sup>8</sup> ) | Male SD rats                     | 7 days             | 3-15 min direct interaction and up to 30 min indirect interaction during the first 3 hours of the light phase                                          | 1st and 7th day of the SDS session***<br>2 weeks after the last SDS                                                            | no change<br>no change                                                                                                                 | no change<br>no change                                      | N/A<br>N/A                                                         | N/A<br>N/A                                                           | decreased in the passive coping group<br>decreased in the passive coping group | N/A<br>N/A                      | N/A<br>N/A                                                                                    | devided into passive and active coping groups. decreased SWS time only in the passive coping group                           | N/A                        | Grafe et al., 2020 <sup>10</sup>    | *The SDS method was originally developed by Miczek (1979) <sup>8</sup> .<br>***EEG was measured subsequently after the SDS, thus the SDS directly affect the EEG data. |
| chronic SDS (Berton-Krishnan-type)      | Male C57Bl/6J mice               | 10 days            | 10 min direct interaction & 24 hour indirect interaction for 10 consecutive days                                                                       | during 10 day SDS<br>5 days after the last SDS                                                                                 | increased<br>returned to control levels                                                                                                | increased<br>increased                                      | increased at day 1 but returned to control levels at day 10<br>N/A | N/A<br>N/A                                                           | increased<br>returned to control levels                                        | no change<br>no change          | increased at day 1 but returned to control levels at day 10<br>N/A                            | Most of the parameters, except for REM sleep bout number, returned to the baseline levels                                    | N/A                        | Wells et al., 2017 <sup>11</sup>    |                                                                                                                                                                        |
| chronic SDS (Berton-Krishnan-type)      | Male C57Bl/6J mice               | 10 days            | 10 min direct interaction & 24 hour indirect interaction for 10 consecutive days                                                                       | 3 day after the SDS                                                                                                            | no change                                                                                                                              | no change                                                   | N/A                                                                | N/A                                                                  | no change                                                                      | no change                       | no change, but subsequent sleep deprivation increases NREM delta powers only in stressed mice | Vigilance states did not differ between stressed and control mice during post-stress baseline, sleep deprivation or recovery | N/A                        | Olini et al., 2017 <sup>12</sup>    |                                                                                                                                                                        |
| chronic SDS (Berton-Krishnan-type)      | Male SD rats                     | 14 days            | 10 min direct interaction & 24 hour indirect interaction for 5 consecutive days plus 48 hour indirect interaction during the weekend for total 2 weeks | 18-28 days after the last SDS                                                                                                  | increased                                                                                                                              | increased                                                   | decreased                                                          | shortened                                                            | decreased                                                                      | increased                       | increased                                                                                     | Changes were prolonged up to one month                                                                                       | rescued                    | Matsuda et al., present study       |                                                                                                                                                                        |

N/A: not available

References

1. Moreau, J. L., Scherschlicht, R., Jenck, F., Martin, J. R. Chronic mild stress-induced anhedonia model of depression; sleep abnormalities and curative effects of electroshock treatment. *Behav. Pharmacol.* **6**, 682-687 (1995).  
2. Cheeta, S., Ruigt, G., van Proosdij, J., Willner, P. Changes in sleep architecture following chronic mild stress. *Biol. Psychiatry* **41**, 419–427 (1997).  
3. Grønli, J., Murison, R., Bjørvatn, B., Sørensen, E., Portas, C. M., Ursin, R. Chronic mild stress affects sucrose intake and sleep in rats. *Behav. Brain Res.* **150**, 139-47 (2004).  
4. Nollet, M., Hicks, H., McCarthy, A. P., Wu, H., Möller-Levet, C. S., Laing, E. E., Malki, K., Lawless, N., Wafford, K. A., Dijk, D. J., Winsky-Sommerer, R. REM sleep's unique associations with corticosterone regulation, apoptotic pathways, and behavior in chronic stress in mice. *Proc. Natl. Acad. Sci. USA* **116**, 2733-2742 (2019).  
5. Hegde, P., Jayakrishnan, H. R., Chatterji, S., Kutty, B. M. & Laxmi, T. R. Chronic stress-induced changes in rem sleep on ̸ oscillations in the rat hippocampus and amygdala. *Brain Res.* **1382**, 155-164 (2011).  
6. Yasugaki, S., Liu, C. Y., Kashiwagi, M., Kanuka, M., Honda, T., Miyata, S., Yanagisawa, M., Hayashi, Y. Effects of 3 weeks of water immersion and restraint stress on sleep in mice. *Front. Neurosci.* **13**, 1072 (2019).  
7. Page, G. G., Opp, M. R., Kozachik, S. L. Sex differences in sleep, anhedonia, and HPA axis activity in a rat model of chronic social defeat. *Neurobiol. Stress* **3**, 105–113 (2016).  
8. Miczek, K. A. A new test for aggression in rats without aversive stimulation: differential effects of d-amphetamine and cocaine. *Psychopharmacology* **60**, 253–259 (1979).  
9. Henderson, F., Vialou, V., Mestikawy, S. E., Fabre, V. Effects of social defeat stress on sleep in mice. *Front. Behav. Neurosci.* **11**, 227 (2017).  
10. Grafe, L. A., O'Mara, L., Branch, A., Dobkin, J., Luz, S., Vigderman, A., Shingala, A., Kubin, L., Ross, R., Bhatnagar, S. Passive coping strategies during repeated social defeat are associated with long-lasting changes in sleep in rats. *Front. Syst. Neurosci.* **14**, 6 (2020).  
11. Wells, A. M., Ridener, E., Bourbonnais, C. A., Kim, W., Pantazopoulos, H., Carroll, F. I., Kim, K. S., Cohen, B. M., Carlezon, W. A., Jr. Effects of chronic social defeat stress on sleep and circadian rhythms are mitigated by kappa-opioid receptor antagonism. *J. Neurosci.* **37**, 7656-7668 (2017).  
12. Olini, N., Rothfuchs, I., Azzinnari, D., Pryce, C., Kurth, S., Huber, R. Chronic social stress leads to altered sleep homeostasis in mice. *Behav. Brain Res.* **327**, 167-173 (2017).
